# Supplementary material for: Asymmetric fused-ring electron acceptor with two distinct terminal groups for efficient organic solar cells
Source: Royal Society of Chemistry journal article supplement (doi:10.1039/c9ta01285k), 2019-01-01
Supplement: c9ta01285k1.pdf [file c9ta01285k1.pdf]

## Supporting Information

### **Asymmetric Fused-Ring Electron Acceptor with Two Distinct Terminal Groups for Efficient Organic Solar Cells**

Linglong Ye,<sup>‡a</sup> Yuanpeng Xie,<sup>‡b</sup> Yiqun Xiao,<sup>c</sup> Jiali Song,<sup>b</sup> Chao Li,<sup>b</sup> Huiting Fu,<sup>b</sup>  
Kangkang Weng,<sup>b</sup> Xinhui Lu,<sup>\*c</sup> Songting Tan,<sup>\*a</sup> and Yanming Sun<sup>\*b</sup>

<sup>a</sup> Key Laboratory of Environmentally Friendly Chemistry and Applications of  
Ministry of Education, College of Chemistry, Xiangtan University, Xiangtan,  
411105, China

<sup>b</sup> School of Chemistry, Beihang University, Beijing 100191, China

<sup>c</sup> Department of Physics, The Chinese University of Hong Kong, New Territories  
999077, Hong Kong

E-mail: [xhlu@phy.cuhk.edu.hk](mailto:xhlu@phy.cuhk.edu.hk), [tanst2008@163.com](mailto:tanst2008@163.com), [sunym@buaa.edu.cn](mailto:sunym@buaa.edu.cn)

## Characterizations of compounds

The  $^1\text{H}$  and  $^{13}\text{C}$  NMR spectra were recorded on a Bruker AV-300, using the residual solvent resonance of  $\text{CDCl}_3$ . Matrix-assisted laser desorption/ionization Fourier transform ion cyclotron resonance-mass spectrometry (MALDI-FTICR-MS) was determined on IonSpec 4.7 Tesla Fourier transform mass spectrometer. UV-vis absorption spectra were measured using a UV-vis spectrophotometer (Shimadzu UV-2700). Atomic force microscopy (AFM) images were investigated on a Dimension Icon AFM (Bruker) in a tapping mode. Grazing incidence wide angle X-ray scattering (GIWAXS) measurements were accomplished with a Xeuss 2.0 SAXS/WAXS laboratory beamline using a Cu X-ray source (8.05 keV, 1.54 Å) and a Pilatus3R 300K detector. The incidence angle is  $0.2^\circ$ . Cyclic voltammetry (CV) measurements were performed on a CHI660E electrochemical workstation in a three-electrode cell in anhydrous acetonitrile solvents solution of  $\text{Bu}_4\text{NPF}_6$  (0.1 M) with a scan rate of 50 mV/s at room temperature under argon. A Ag/Ag $^+$  wire, two platinum wires were used as the reference electrode, counter electrode, and working electrode, respectively. The potential of Ag/Ag $^+$  reference electrode was internally calibrated by using ferrocene/ferrocenium (Fc/Fc $^+$ ) as the redox couple. Space-charge-limited current (SCLC): The current density–voltage ( $J$ – $V$ ) characteristics of the hole or electron only devices are fitted by the Mott–Gurney law:

$$J = (9/8)\epsilon_r\epsilon_0\mu(V^2/L^3)$$

where  $J$  is the current density,  $\epsilon_r$  is the dielectric permittivity of the active layer,  $\epsilon_0$  is the vacuum permittivity,  $L$  is the thickness of the active layer,  $\mu$  is the mobility.  $V = V_{\text{app}} - V_{\text{bi}}$ , where  $V_{\text{app}}$  is the applied voltage,  $V_{\text{bi}}$  is the offset voltage ( $V_{\text{bi}}$  is 0 V here). The mobility can be calculated from the slope of the  $J^{0.5} \sim V$  curves.

## Organic solar cells fabrication and characterization

Organic solar cells with inverted device architecture of ITO/ZnO/Polymers: Acceptor/MoO $_3$ /Ag were fabricated. The ITO-coated glass substrates were firstly cleaned by ultrasonic treatment in detergent, deionized water, acetone, and isopropyl alcohol for 20 minutes, respectively. After drying at 110 °C for one night, ZnO precursor

solution was spin coated at 4000 rpm and the ZnO layer was generated at 200 °C for 15 min in ambient atmosphere. The active layers with a thickness of 100 nm were spin-coated from a solution of polymers: acceptor with a weight ratio 1:1 in chlorobenzene. Solution with a volume ratio DIO of 0.25% was stirred overnight prior to cast. The active layers were allowed to heat at 100 °C for 10 min in a N<sub>2</sub>-filled glovebox. The MoO<sub>3</sub> were deposited by sequential thermal evaporation of 3 nm followed by 90 nm of Ag. The device area is 4.00 mm<sup>2</sup>. Current density-voltage (*J-V*) characteristics were measured using a Keithley 2400 Source Measure Unit. The currents were measured under 100 mW cm<sup>-2</sup> simulated 1.5 Global (AM 1.5 G) solar simulator (Enli Technology Co., Ltd, SS-F5-3A). The light intensity was calibrated by a standard Si solar cell (SRC-2020, Enli Technology Co., Ltd). EQE spectra were carried out by using a QEX10 Solar Cell IPCE measurement system (PV Measurements, Inc.).

## Materials

The polymer PBT1-C-2Cl and the small acceptor ITCPTC were synthesized according to the reported literatures.<sup>1, 2</sup> Other reagents and solvents were purchased from commercial sources and were used without further purification unless stated otherwise. Tetrahydrofuran (THF) and ether were distilled over sodium and benzophenone.

### Synthesis of IDTT-2F-Th.

A solution of IDTT-2CHO (100 mg,  $9.30 \times 10^{-2}$  mmol), 2-(6-oxo-5,6-dihydro-4*H*-cyclopenta[*c*]thiophen-4-ylidene)malononitrile (20 mg,  $10.23 \times 10^{-2}$  mmol, 1.1 eq) and 2-(5,6-difluoro-3-oxo-2,3-dihydro-1*H*-inden-1-ylidene)malononitrile (21 mg,  $9.30 \times 10^{-2}$  mmol, 1 eq) in 20 mL chloroform was stirred at room temperature. Then pyridine (five drops) was added to the system. The reaction mixture was heated at 65 °C overnight. After cooling down to room temperature, the solvent was evaporated and the residue was purified with silica gel chromatography (eluent: petroleum ether/DCM, *v/v*, 2:3) to provide pure product as purple solid (0.41 g, 30%). <sup>1</sup>H NMR (300 MHz, CDCl<sub>3</sub>) δ 8.84 (d, *J* = 17.3 Hz, 2H), 8.53 (dd, *J* = 9.9, 6.4 Hz, 1H), 8.35 (s, 1H), 8.22 (d, *J* =

16.9 Hz, 2H), 7.90 (s, 1H), 7.70-7.65 (m, 3H), 7.22 (d,  $J = 7.9$  Hz, 8H), 7.15 (d,  $J = 7.9$  Hz, 8H), 2.57 (t,  $J = 7.8$  Hz, 8H), 1.64-1.54 (m, 8H), 1.38-1.25 (m, 24H), 0.88-0.83 (m, 12H).  $^{13}\text{C}$  NMR (75 MHz,  $\text{CDCl}_3$ )  $\delta$  185.78, 181.28, 156.06, 155.83, 155.78, 153.78, 153.09, 147.82, 147.71, 147.66, 147.47, 143.91, 143.81, 142.61, 142.57, 142.50, 142.17, 139.69, 139.44, 139.42, 138.86, 138.84, 138.45, 137.50, 137.21, 137.01, 136.88, 128.90, 128.82, 127.87, 127.75, 125.56, 121.72, 118.69, 118.65, 115.11, 114.94, 114.81, 114.25, 114.11, 112.33, 67.79, 63.24, 35.62, 31.72, 31.28, 29.20, 22.61, 14.12. MALDI-FTICR-MS [M]  $\text{C}_{92}\text{H}_{78}\text{F}_2\text{N}_4\text{O}_2\text{S}_5$ :  $m/z$  calcd. 1468.4696; found: 1468.4683.

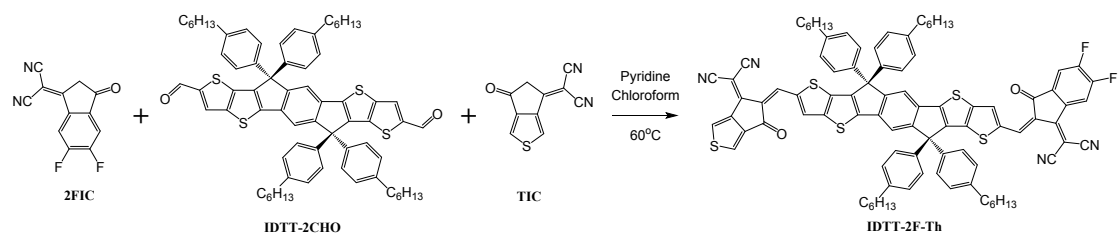

**Scheme S1.** Synthesis route of IDTT-2F-Th.

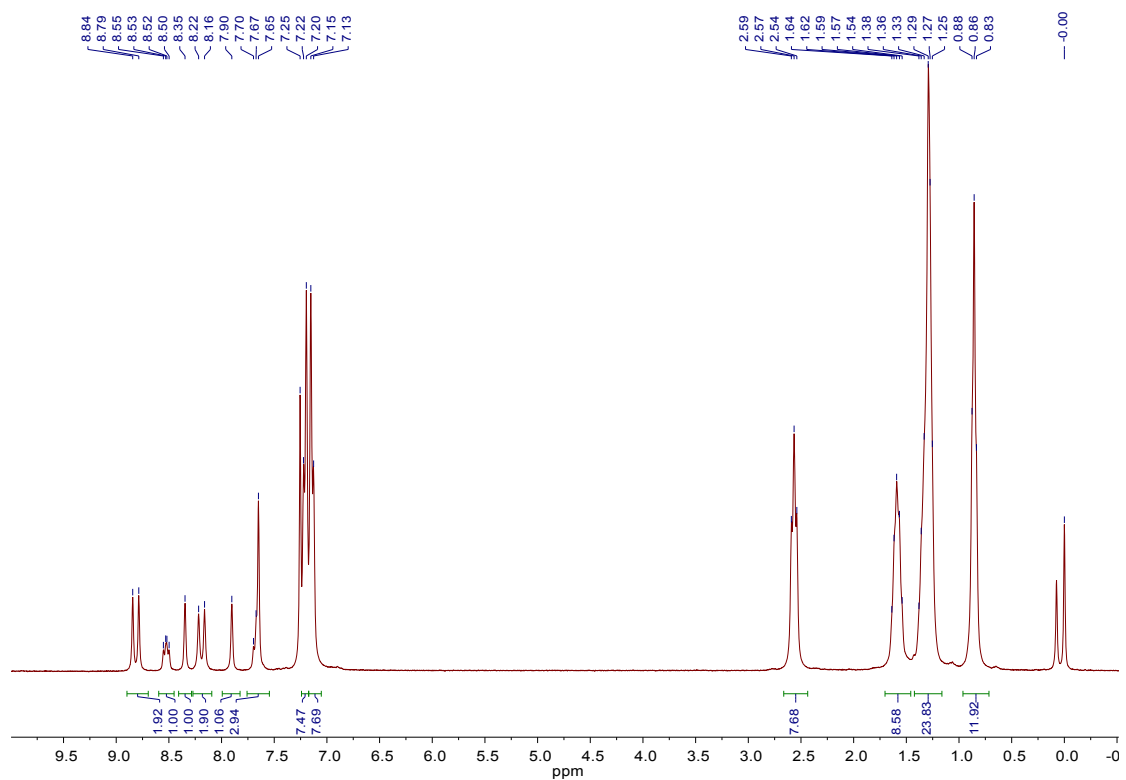

**Fig. S1.** The  $^1\text{H}$  NMR spectra of IDTT-2F-Th in  $\text{CDCl}_3$ .

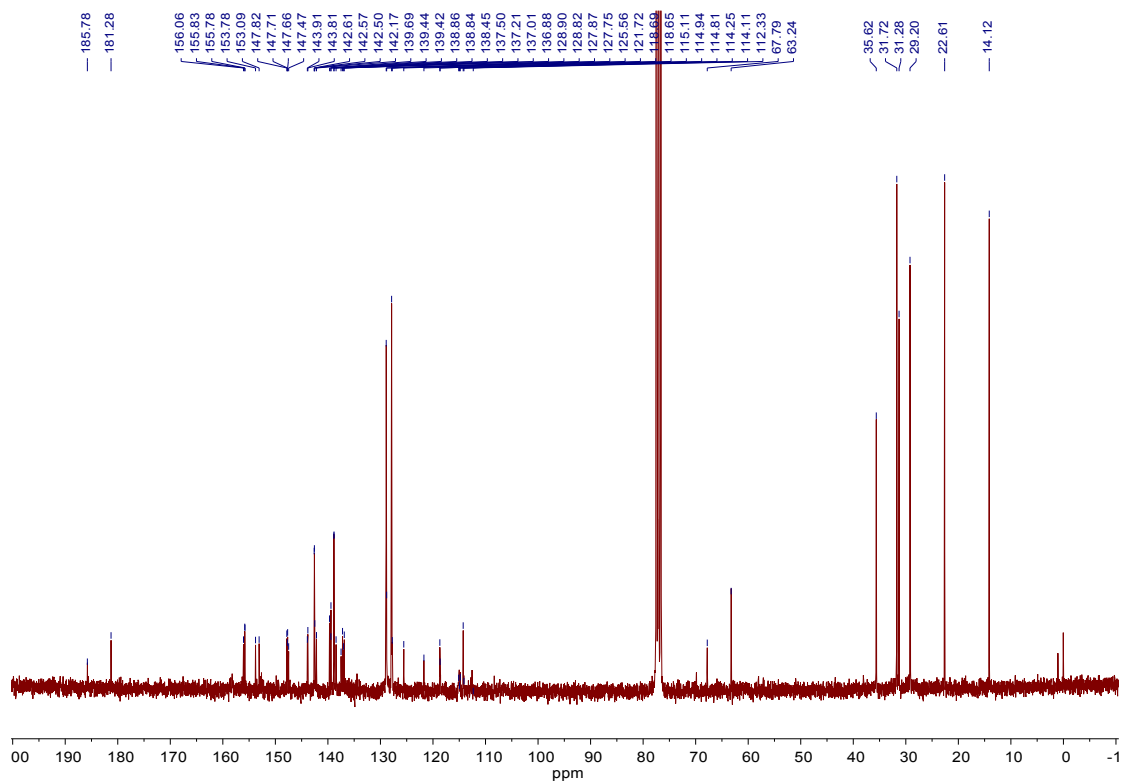

**Fig. S2.** The  $^{13}\text{C}$  NMR spectra of IDTT-2F-Th in  $\text{CDCl}_3$ .

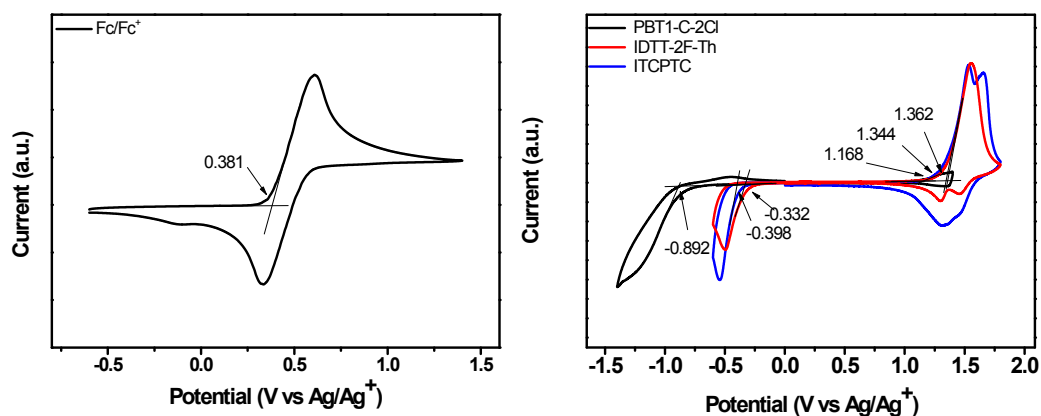

**Fig. S3.** The curves of the cyclic voltammetry (CV) measurements for ferrocene/ferrocenium on the left, and PBT1-C-2Cl, ITCPTC and IDTT-2F-Th on the right.

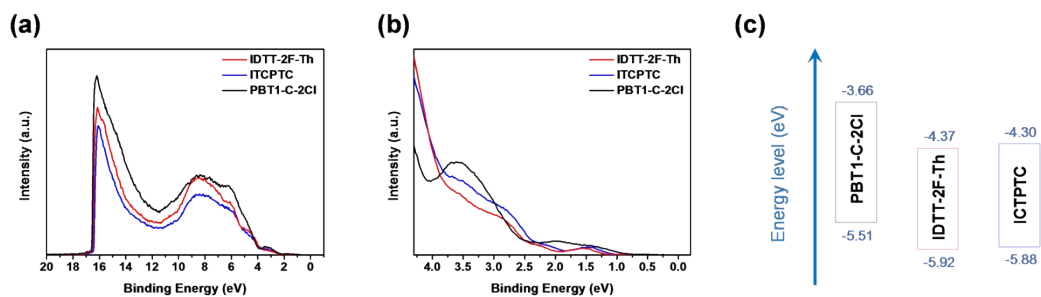

**Fig. S4.** (a, b) UPS spectra of PBT1-C-2Cl, ITCPTC and IDTT-2F-Th films and (c) the energy levels measured from UPS. The LUMO levels are calculated from the  $E_g^{\text{opt}}$  and the HOMO levels from UPS spectra.

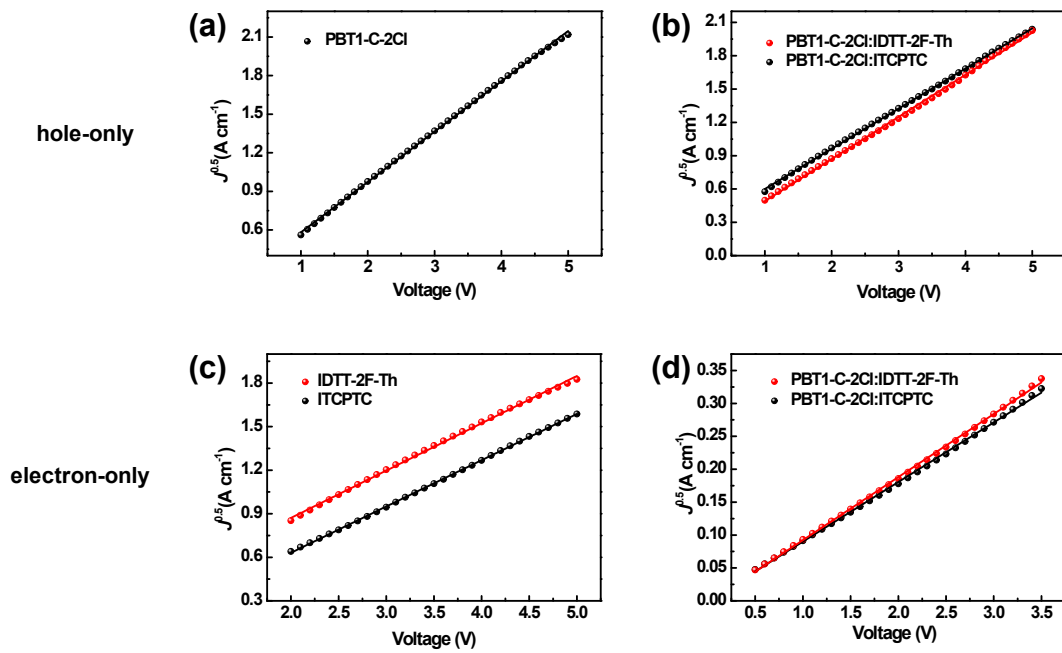

**Fig. S5.** (a, b) Characteristic curves of hole-only SCLC devices; (c, d) Characteristic curves of electron-only SCLC devices.

**Table S1.** Photovoltaic Performance of PBT1-C-2Cl:IDTT-2F-Th solar cells (10 devices).

| PBT1-C-2Cl:IDTT-<br>2F-Th | $J_{sc}$<br>(mA cm <sup>-2</sup> ) | $V_{oc}$<br>(V) | FF<br>(%) | PCE<br>(%) |
|---------------------------|------------------------------------|-----------------|-----------|------------|
| 1                         | 17.60                              | 0.912           | 74.3      | 11.90      |
| 2                         | 17.11                              | 0.909           | 71.2      | 11.32      |
| 3                         | 17.15                              | 0.899           | 71.6      | 11.0       |
| 4                         | 17.69                              | 0.912           | 72.8      | 11.75      |
| 5                         | 17.53                              | 0.908           | 72.8      | 11.58      |
| 6                         | 17.38                              | 0.905           | 74.5      | 11.72      |
| 7                         | 17.82                              | 0.912           | 73.9      | 12.01      |
| 8                         | 17.57                              | 0.909           | 72.8      | 11.62      |
| 9                         | 17.65                              | 0.907           | 71.7      | 11.48      |
| 10                        | 17.52                              | 0.911           | 74.3      | 11.85      |

**Table S2.** Photovoltaic Performance of PBT1-C-2Cl:ITCPTC solar cells (10 devices).

| PBT1-C-<br>2Cl:ITCPTC | $J_{sc}$<br>(mA cm <sup>-2</sup> ) | $V_{oc}$<br>(V) | FF<br>(%) | PCE<br>(%) |
|-----------------------|------------------------------------|-----------------|-----------|------------|
| 1                     | 15.81                              | 0.967           | 66.8      | 10.20      |
| 2                     | 15.55                              | 0.963           | 65.0      | 9.73       |
| 3                     | 15.68                              | 0.962           | 66.0      | 9.96       |
| 4                     | 15.92                              | 0.968           | 66.9      | 10.31      |
| 5                     | 15.26                              | 0.964           | 65.2      | 9.60       |
| 6                     | 15.42                              | 0.962           | 66.0      | 9.81       |
| 7                     | 15.75                              | 0.968           | 66.3      | 10.11      |
| 8                     | 15.60                              | 0.966           | 65.2      | 9.83       |
| 9                     | 15.8                               | 0.963           | 66.0      | 10.04      |
| 10                    | 15.17                              | 0.961           | 63.8      | 9.30       |

**Table S3.** The hole and electron mobilities according to SCLC measurements.

|                            | $\mu_h/\mu_e$ | $\mu_h$<br>(cm <sup>2</sup> V <sup>-1</sup> s <sup>-1</sup> ) | $\mu_e$<br>(cm <sup>2</sup> V <sup>-1</sup> s <sup>-1</sup> ) |
|----------------------------|---------------|---------------------------------------------------------------|---------------------------------------------------------------|
| PBT1-C-2Cl                 | /             | 1.20×10 <sup>-3</sup>                                         | /                                                             |
| ITCPTC                     | /             | /                                                             | 3.4×10 <sup>-4</sup>                                          |
| IDTT-2F-Th                 | /             | /                                                             | 3.1×10 <sup>-4</sup>                                          |
| PBT1-C-2Cl<br>: ITCPTC     | 11.5          | 1.07×10 <sup>-3</sup>                                         | 9.3×10 <sup>-5</sup>                                          |
| PBT1-C-2Cl<br>: IDTT-2F-Th | 10.3          | 9.0×10 <sup>-4</sup>                                          | 8.7×10 <sup>-5</sup>                                          |

1. D. Xie, T. Liu, W. Gao, C. Zhong, L. Huo, Z. Luo, K. Wu, W. Xiong, F. Liu, Y. Sun and C. Yang, *Solar RRL*, 2017, **1**, 1700044.
2. T. Liu, L. Huo, S. Chandrabose, K. Chen, G. Han, F. Qi, X. Meng, D. Xie, W. Ma, Y. Yi, J. M. Hodgkiss, F. Liu, J. Wang, C. Yang and Y. Sun, *Adv. Mater.*, 2018, **30**, 1707353.
